# Supplementary material for: Brain Transcriptional Profiles of Male Alternative Reproductive Tactics and Females in Bluegill Sunfish
Source: PLOS journal article supplement (doi:10.1371/journal.pone.0167509), 2016-12-01
Supplement: S1 (10.1371/journal.pone.0167509.s001) [file journal.pone.0167509.s001]

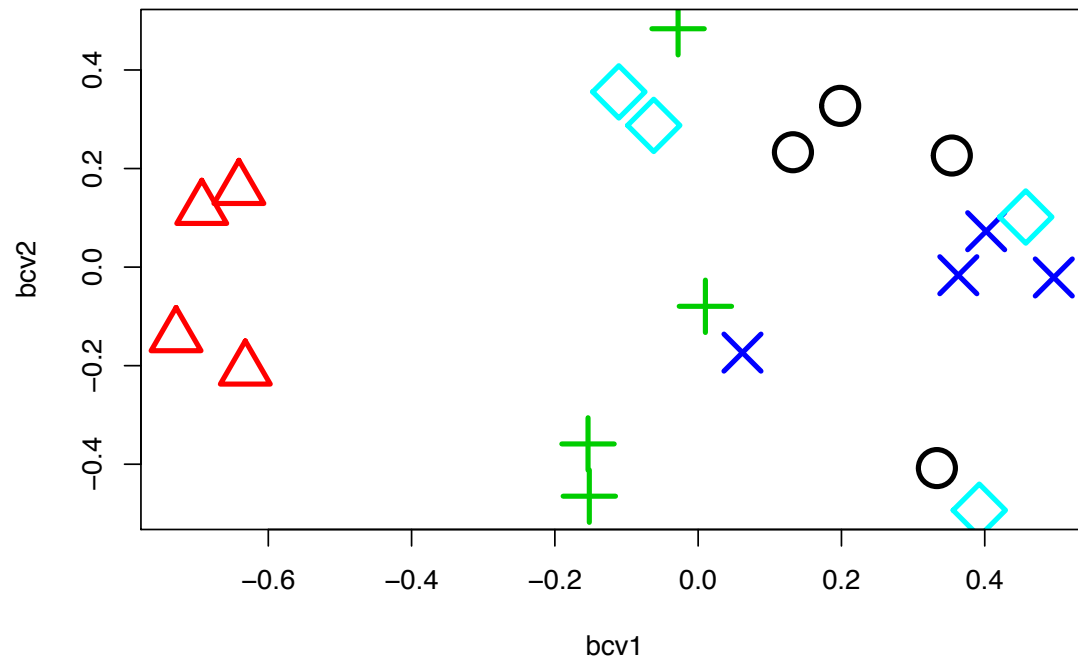

Supplement Figure 1: Multi-dimensional space (MDS) plot based on the biological coefficient of variation (bcv) among bluegill male ARTs. Red triangles: sneaker males, green pluses: satellite males, black circles: spawning parental males, blue X: non-spawning parental males, light blue diamonds: females.
