# Supplementary material for: Brain Transcriptional Profiles of Male Alternative Reproductive Tactics and Females in Bluegill Sunfish
Source: PLoS One. 2016 Dec 1;11(12):e0167509. doi: 10.1371/journal.pone.0167509 (PMC5132329; doi:10.1371/journal.pone.0167509)
Supplement: S5 Table — (XLSX) [file pone.0167509.s006.xlsx]

## Sheet: BiologicalFunction
Supplement 5: Biological Process GO terms that are significantly enriched with genes differentially expressed between tactics
Comparisons	GO Term	GO Name	P-value
Parental vs Satellite Males
Higher in Parentals	GO:0055114	oxidationreduction process	1.6576e-08
Higher in Satellites	GO:0006811	ion transport	0.0007154
Parental vs Sneaker Males
Higher in Parentals	GO:0006412	translation	1.43312e-24
	GO:0055114	oxidationreduction process	2.028e-13
	GO:0051603	proteolysis involved in cellular protein catabolic process	0.000265778
	GO:0006413	translational initiation	0.00048672
	GO:0044237	cellular metabolic process	0.0030504
	GO:0006414	translational elongation	0.0109046
	GO:0015986	ATP synthesis coupled proton transport	0.0109046
	GO:0042254	ribosome biogenesis	0.0109046
	GO:0009790	embryo development	0.0193532
	GO:0006457	protein folding	0.026036
	GO:0030163	protein catabolic process	0.0303604
	GO:0015031	protein transport	0.0360676
	GO:0009116	nucleoside metabolic process	0.0360676
	GO:0030218	erythrocyte differentiation	0.0360676
High in Sneakers	GO:0006811	ion transport	1.5811e-08
	GO:0007156	homophilic cell adhesion via plasma membrane adhesion molecules	2.8324e-06
	GO:0006468	protein phosphorylation	3.26567e-06
	GO:0007155	cell adhesion	3.492e-05
	GO:0070588	calcium ion transmembrane transport	0.00012222
	GO:0035235	ionotropic glutamate receptor signaling pathway	0.00200348
	GO:0007268	synaptic transmission	0.00350883
	GO:0006813	potassium ion transport	0.00582803
	GO:0006355	regulation of transcription, DNA-templated	0.00626397
	GO:0006810	transport	0.00626397
	GO:0034765	regulation of ion transmembrane transport	0.00646786
	GO:0006208	pyrimidine nucleobase catabolic process	0.00913021
	GO:0032312	regulation of ARF GTPase activity	0.0113969
	GO:0007018	microtubule based movement	0.0170147
	GO:0007154	cell communication	0.0255794
	GO:0007165	signal transduction	0.0324735
	GO:0035335	peptidyltyrosine dephosphorylation	0.0324735
	GO:0006278	RNA dependent DNA replication	0.0426449
	GO:0007269	neurotransmitter secretion	0.0487354

## Sheet: MolecularProcesses
Supplement 5: Molecular Function GO terms that are significantly enriched with genes differentially expressed between tactics
Comparisons	GO Term	GO Name	P-value
Parentals vs Satellites
Higher in Parentals	GO:0005506	iron ion binding	2.5608e-06
	GO:0016491	oxidoreductase activity	4.6068e-06
	GO:0020037	heme binding	0.00029304
	GO:0003995	acylCoA dehydrogenase activity	0.033173
	GO:0016705	oxidoreductase activity, acting on paired donors, with incorporation or reduction of molecular oxygen	0.0453741
	GO:0003824	catalytic activity	0.0472132
Higher in Satellites	GO:0003676	nucleic acid binding	4.2642e-07
	GO:0005216	ion channel activity	0.00276555
	GO:0005525	GTP binding	0.0344549
Parentals vs Sneakers
Higher in Parentals	GO:0003735	structural constituent of ribosome	2.4435e-28
	GO:0016491	oxidoreductase activity	5.9549e-15
	GO:0003824	catalytic activity	8.66538e-06
	GO:0005506	iron ion binding	1.37725e-05
	GO:0009055	electron carrier activity	1.68933e-05
	GO:0004129	cytochrome C oxidase activity	3.06308e-05
	GO:0003743	translation initiation factor activity	3.24507e-05
	GO:0020037	heme binding	3.5295e-05
	GO:0004298	threoninetype endopeptidase activity	3.5295e-05
	GO:0004175	endopeptidase activity	9.412e-05
	GO:0017111	nucleosidetriphosphatase activity	0.00136576
	GO:0016209	antioxidant activity	0.00275204
	GO:0005525	GTP binding	0.00393865
	GO:0050662	coenzyme binding	0.00572091
	GO:0019843	rRNA binding	0.00572091
	GO:0008137	NADH dehydrogenase (ubiquinone) activity	0.00948171
	GO:0003924	GTPase activity	0.0103353
	GO:0016853	isomerase activity	0.0103353
	GO:0005544	calciumdependent phospholipid binding	0.0141776
	GO:0008289	lipid binding	0.0148922
	GO:0016616	oxidoreductase activity, acting on the CHOH group of donors, NAD or NADP as acceptor	0.0177509
	GO:0016881	acidamino acid ligase activity	0.0245689
	GO:0016747	transferase activity, transferring acyl groups other than aminoacyl groups	0.0250096
	GO:0003755	peptidylprolyl cistrans isomerase activity	0.0348082
	GO:0051536	ironsulfur cluster binding	0.0391462
	GO:0008233	peptidase activity	0.0422941
	GO:0015035	protein disulfide oxidoreductase activity	0.0422941
Higher in Sneaker	GO:0005216	ion channel activity	3.6218e-06
	GO:0005515	protein binding	0.000271908
	GO:0004970	ionotropic glutamate receptor activity	0.000723956
	GO:0005234	extracellular glutamate gated ion channel activity	0.000723956
	GO:0004221	ubiquitin thiolesterase activity	0.000723956
	GO:0015269	calciumactivated potassium channel activity	0.04
	GO:0005245	voltagegated calcium channel activity	0.0413902
	GO:0016812	hydrolase activity, acting on carbonnitrogen (but not peptide) bonds, in cyclic amides	0.0431
	GO:0005249	voltagegated potassium channel activity	0.0431
	GO:0008270	zinc ion binding	0.0431
